# Supplementary material
Source: PubMed Central journal article supplement (PMC5697428)
Supplement: NIHMS881978-supplement-2.pdf [file NIHMS881978-supplement-2.pdf]

**Supplementary Table 1: Screening of Kinase Inhibitors in Prostate Cancer Cells**

| Name of inhibitor | Target     | Concentration ( $\mu$ M) | AR stabilization | CHIP phosphorylation |
|-------------------|------------|--------------------------|------------------|----------------------|
| U0126             | MEK1/2     | 5-10                     | No               | +                    |
| SB203580          | P38 MAPK   | 5-10                     | No               | +                    |
| LY294002          | PI3K       | 5-10                     | Yes              | -                    |
| Wortmannin        | PI3K       | 2-5                      | Yes              | -                    |
| H-89              | PKA        | 5                        | No               | +                    |
| GF-109            | PKC        | 5                        | No               | +                    |
| Rapamycin         | mTOR       | 0.2                      | No               | +                    |
| KU55933           | ATM        | 5-10                     | No               | +                    |
| NU7026            | DNA-PKc    | 5-10                     | No               | +                    |
| MK-2206           | Akt        | 2-5                      | No               | +                    |
| siAkt             | Akt        | -                        | No               | +                    |
| siPDK             | PDK        | -                        | No               | +                    |
| MLN8054           | Aurora A   | 1-2                      | Yes              | -                    |
| VX680             | Aurora A   | 1-2                      | Yes              | -                    |
| ZM447439          | Aurora B   | 1-2                      | Yes              | +                    |
| SG11776           | PIM Kinase | 2-5                      | No               | +                    |
| BI6727            | PLK        | 1-2                      | No               | +                    |
| siPLK             | PLK        | -                        | No               | +                    |
